# Supplementary material for: Synthesis of iron oxide coated fluoridated HAp/Ln3+ (Ln = Eu or Tb) nanocomposites for biological applications
Source: Royal Society of Chemistry journal article supplement (doi:10.1039/c4cc06977c), 2014-01-01
Supplement: c4cc06977c1.pdf [file c4cc06977c1.pdf]

**Supporting Information for**  
**Synthesis of Iron Oxide coated Fluoridated HAp/Ln<sup>3+</sup> (Ln=Eu or Tb)**  
**nanocomposites for Biological Applications**

Jie Pan,<sup>a\*</sup>Juchen Zhang,<sup>a</sup> Lili Wang,<sup>a</sup> Dong Wan<sup>a\*</sup>

*<sup>a</sup> State Key Laboratory of Hollow Fiber Membrane Materials and Processes, Department of  
Pharmaceutical Engineering, School of Environmental and Chemical Engineering, Tianjin  
Polytechnic University, Tianjin 300387, P. R. China*

\*Corresponding author e-mail: panjie@tjpu.edu.cn; wandong\_tjpu@126.com

**RECEIVED DATE ;**

## **Materials and methods**

### *1. Materials*

Ca(NO<sub>3</sub>)<sub>2</sub>·4H<sub>2</sub>O, Na<sub>3</sub>PO<sub>4</sub>·12H<sub>2</sub>O, NaF, NaOH, octadecylamine, oleic acid, ethanol, cyclohexane, polyvinylpyrrolidone (PVP), triethylene glycol (TEG) and Iron(III) acetylacetonate (Fe(acac)<sub>3</sub>) were obtained from Beijing Chemical Reagents Company, China. Eu(NO<sub>3</sub>)<sub>3</sub>·6H<sub>2</sub>O, Tb(NO<sub>3</sub>)<sub>3</sub>·6H<sub>2</sub>O and Pluronic F127 was purchased from Sigma Chemical (St. Louis, MO, USA). All of the chemicals were used without further purification.

### *2. Preparation of hydrophilic FHAp/Eu<sup>3+</sup> (or Tb<sup>3+</sup>) nanorods*

Based on a procedure described by Hui *et al*, hydrophobic FHAp/Eu<sup>3+</sup>(or Tb<sup>3+</sup>) nanorods were fabricated.<sup>1</sup> In a brief, in a teflon-lined autoclave (50ml), octadecylamine (0.5 g) were dissolved in oleic acid (4 mL) by heating. This solution was mixed with ethanol (16 mL) and an aqueous solution of Ca(NO<sub>3</sub>)<sub>2</sub> (0.28M, 7 mL) under agitation. Next, aqueous solutions of Eu(NO<sub>3</sub>)<sub>3</sub> or Tb(NO<sub>3</sub>)<sub>3</sub> (0.28M, 0.7 mL), NaF (0.28M, 0.35 mL), and Na<sub>3</sub>PO<sub>4</sub>(0.16M, 7 mL) were added to the solution. The mixture was agitated for about 5 min. Furthermore, this mixture was sealed and hydrothermally treated at a controlled temperature of 180°C for about 12 h. After centrifugation, the obtained nanorods were further washed with cyclohexane and ethanol several times. Finally, these nanorods were re-dispersed in cyclohexane.

To enable hydrophobic FHAp/Eu<sup>3+</sup> (or Tb<sup>3+</sup>) nanorods dissolve in aqueous solutions, the following approach was exploited.<sup>1</sup> Briefly, 60 mg FHAp/Eu<sup>3+</sup> (or Tb<sup>3+</sup>) nanorods in 5 mL of cyclohexane were mixed with 80 mg of Pluronic F127 in a 100 mL vial with 30 mL H<sub>2</sub>O. Subsequently, 10 mL of tetrahydrofuran (THF) was added and stirred to obtain a turbid suspension. A rotatory evaporator was used to remove organic solvents at reduced pressure. And the Pluronic F127 dispersed FHAp/Eu<sup>3+</sup> (or Tb<sup>3+</sup>) nanorods were washed by centrifugation many times in order to remove excess Pluronic F127. Finally, hydrophilic FHAp/Eu<sup>3+</sup> (or Tb<sup>3+</sup>) nanorods were collected with centrifugation for further use.

### *3. Preparation of iron oxide coated FHAp/Eu<sup>3+</sup> (or Tb<sup>3+</sup>) nanocomposites*

Fluorescent-magnetic nanocomposites of iron oxide coated FHAp/Eu<sup>3+</sup> (or Tb<sup>3+</sup>)

nanorods were fabricated through thermal decomposition of Iron (III) acetylacetonate ( $\text{Fe}(\text{acac})_3$ ) in triethylene glycol (TEG) on the surface of FHAp/ $\text{Eu}^{3+}$  (or  $\text{Tb}^{3+}$ ) nanorods. In detailed, iron oxide coated FHAp/  $\text{Eu}^{3+}$  (or  $\text{Tb}^{3+}$ ) nanocomposites (abbreviation as IO-Eu-FHAp or IO-Tb-FHAp) were prepared by thermal decomposition of  $\text{Fe}(\text{acac})_3$  in triethylene glycol (TEG) in the presence of hydrophilic FHAp: $\text{Eu}^{3+}$ (or  $\text{Tb}^{3+}$ ) nanorods. 2 mg (or 5 mg or 10 mg) of  $\text{Fe}(\text{acac})_3$  and 50 mg of PVP (90k) were firstly dissolved in 6 mL TEG. Furthermore, 10 mg hydrophilic FHAp/  $\text{Eu}^{3+}$  (or  $\text{Tb}^{3+}$ ) nanorods was added in above solution and dispersed through vigorous stirring for about 5 h. After transferred into a Teflon-lined stainless steel autoclave (10 mL in total volume), the suspension was sealed and maintained at 180 °C for 15 h. Finally, the suspension was cooled to room temperature naturally followed by centrifugation and washing several times with water.

#### *4. Characterization of nanocomposites*

The sizes and morphologies of nanocomposites were investigated with HITACHI H-7650B transmission electron microscope at 100 kV and Tecnai G2 F20 S-Twin high resolution transmission electron microscope operated at 200 kV. The phase purity of the products was examined by XRD on a Rigaku RU-200b X-ray powder diffractometer by using a nickel-filtered  $\text{Cu}_{\text{K}\alpha}$  radiation in the range 10–80° with a scan rate of 10°/min. Luminescence spectra were determined with a Hitachi F-4500 fluorescence spectrophotometer at an excitation wavelength of 405 and 488 nm for IO-Eu-FHAp (FHAp/  $\text{Eu}^{3+}$ : IO = 2:1) and IO-Tb-FHAp (FHAp/  $\text{Tb}^{3+}$ : IO = 2:1), respectively. A vibrating sample magnetometer (VSM) was exploited to investigate the hysteresis curve of IO-Eu-FHAp (FHAp/  $\text{Eu}^{3+}$ : IO = 2:1). Dried sample of known mass was taken in non-magnetic aluminum sheet. The sample was subjected to varying magnetic field at room temperature and the magnetization was measured.

#### *5. Cytotoxicity of nanocomposites*

A549 cells were cultured in the Dulbecco's Modified Eagle's Medium (DMEM) supplemented with 10% fetal bovine serum (FBS) and 1% penicillin-streptomycin as the antibiotics in humidified environment of 5%  $\text{CO}_2$  at 37°C. The cells were pre-cultured until 80% confluence was reached. Cell counting kit-8 (CCK-8) assay was

used to evaluate the cytotoxicity of the nanocomposites. Briefly, cells were seeded in 96-well microplates at a density of  $5 \times 10^4$  cells/mL in medium. After 24 h seeding, the cells were further treated with DMEM at 0, 20, 40, 80, 150 and 300  $\mu\text{g mL}^{-1}$  nanocomposites concentration for 8 and 24 h, respectively. Next, old medium containing nanocomposites was removed, and cells were washed with PBS three times. Furthermore, 10  $\mu\text{L}$  of CCK-8 dye and 100  $\mu\text{L}$  of fresh DMEM were added to each sample well followed by incubation for 2 h at 37 °C. The absorbance intensity of each sample well was determined with a microplate reader (VictorIII, Perkin-Elmer). The absorbance wavelength of formazan dye was set at 450 nm and reference wavelength at 620 nm. Cell viability was expressed as absorbance relative to that of untreated controls.

#### *6. In vitro cell imaging*

Cells were cultured in chamber (LAB-TEK, Chambered Coverglass System) until reach 80% confluence. And the medium was removed and the adherent cells were washed twice with PBS buffer. Next, the cells were incubated in the medium with IO-Eu-FHAp (FHAp/  $\text{Eu}^{3+}$ : IO = 2:1) and IO-Tb-FHAp (FHAp/  $\text{Tb}^{3+}$ : IO = 2:1) at 250  $\mu\text{g mL}^{-1}$  nanocomposites concentration. After incubation for 4 h, the cells were washed three times with PBS and then fixed with 4% paraformaldehyde for 10 min at room temperature. The cells were further washed twice with PBS and observed using a confocal laser scanning microscope (CLSM) Zesis 710 3-channel (Zesis, Germany) with the excitation wavelengths of 405 nm and 488 nm, respectively.

#### **Reference**

1. J. Hui, X. Zhang, Z. Zhang, S. Wang, L. Tao, Y. Wei and X. Wang, *Nanoscale*, 2012, **4**, 6967-6970.
